# Supplementary material for: Dynamics under confinement: torsional dynamics of Auramine O in a nanocavity
Source: Royal Society of Chemistry journal article supplement (doi:10.1039/c4ra03324h), 2014-01-01
Supplement: c4ra03324h1.pdf [file c4ra03324h1.pdf]

## Supporting Information

### **Dynamics under Confinement: Torsional Dynamics of Auramine O in a Nanocavity**

Prabhat K. Singh, Aruna K. Mora, Sushant Murudkar and Sukhendu Nath

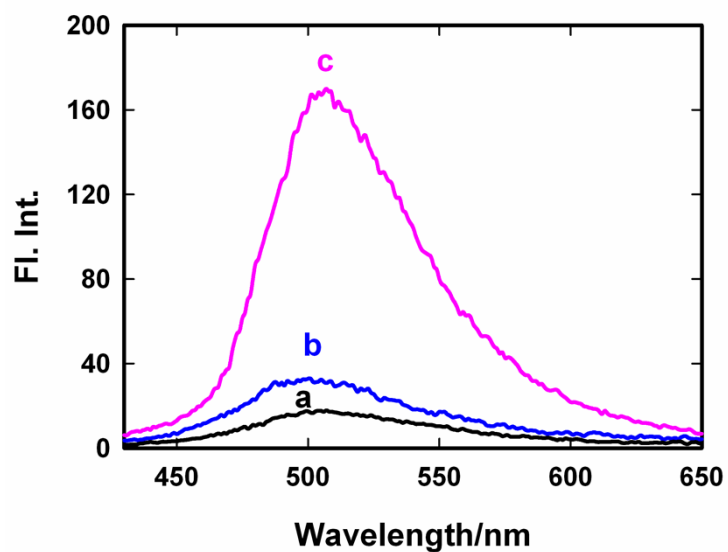

**Figure S1.** Steady-state emission spectra ( $\lambda_{\text{ex}} = 410 \text{ nm}$ ) of Auramine-O ( $5 \mu\text{M}$ ) in (a) water (b) 10 mM b-CD (c) 110  $\mu\text{M}$  SBE- $\beta$ -CD solution.
